# Supplementary material for: Gpr158 mediates osteocalcin’s regulation of cognition
Source: PubMed Central journal article supplement — J Exp Med. 2017 Oct 2;214(10):2859–73. doi: 10.1084/jem.20171320 (PMC5626410; doi:10.1084/jem.20171320), 2017-10-02
Supplement: JEM_20171320_sm.pdf [file JEM_20171320_sm.pdf]

SUPPLEMENTAL MATERIAL

Khrimian et al., <https://doi.org/10.1084/jem.20171320>

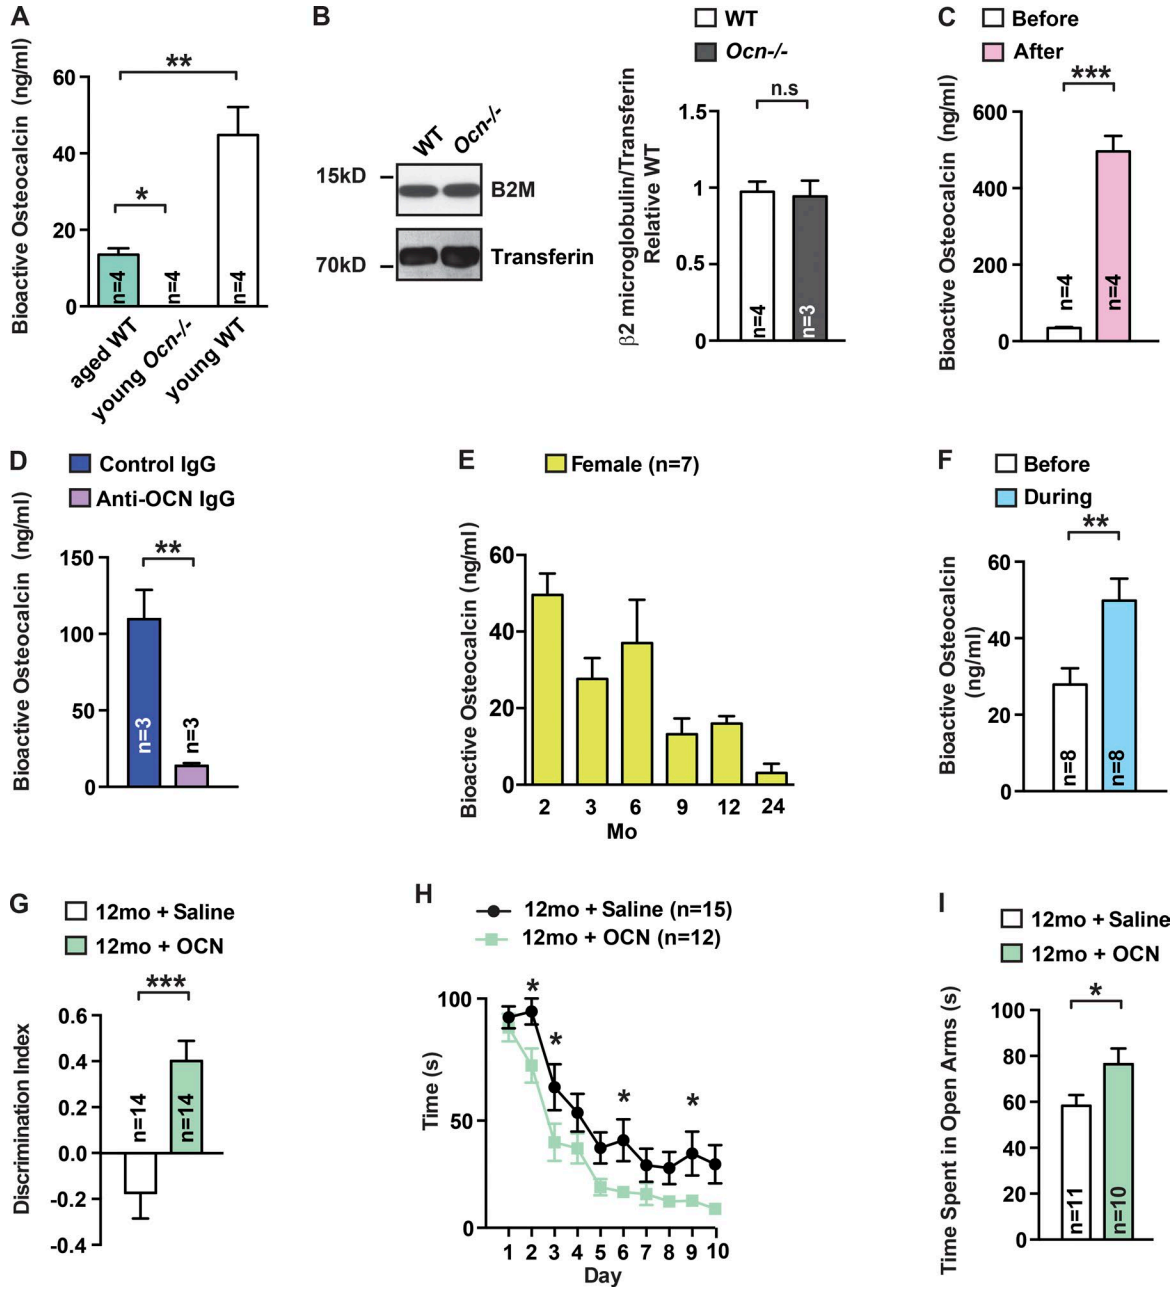

Figure S1. **OCN is sufficient to improve cognitive function and anxiety-like behaviors.** (A) Bioactive OCN content in plasma pooled from young WT, young *Ocn*<sup>-/-</sup>, or older WT used for the treatment of older mice (one-way ANOVA compared with older WT mice, followed by Bonferroni's post hoc test, *n* = 4 mice per group). (B)  $\beta_2$  microglobulin accumulation (representative Western blot, left) and quantification of band intensities (right) in 3-mo-old *Ocn*<sup>-/-</sup> (*n* = 3) and WT (*n* = 4) plasma (Student's *t* test). Transferrin was used as a loading control. (C) Bioactive OCN content in the serum of older mice 24 h before or 10 min after injection with plasma from young *Ocn*<sup>-/-</sup> supplemented with 90 ng/g BW of OCN (Student's *t* test, *n* = 4 mice per group). (D) Bioactive OCN content in plasma from young mice immunodepleted with IgG or anti-OCN antibody (Student's *t* test, *n* = 3 per group). (E) Bioactive OCN content in serum of female 3–24-mo-old mice (*n* = 5–7 per group). (F) Bioactive OCN content in the serum of 16-mo-old mice before and during peripheral OCN treatment (90 ng/hr) via osmotic minipump (Student's *t* test, *n* = 8 per group). (G) NOR performed in 12-mo-old WT mice treated with saline or OCN (30 ng/hr) for 2 mo. Discrimination index was measured (Student's *t* test, *n* = 14 per group). (H) MWMT in 12-mo-old WT mice treated with saline (*n* = 15) or OCN (*n* = 12; 30 ng/hr) for 2 months. The graph shows the time to localize a submerged platform in the swimming area (two-way repeated-measures ANOVA followed by Fisher's least significantly different post-hoc test). (I) EPMT performed in 12-mo-old WT mice treated with saline (*n* = 11) or OCN (*n* = 10; 30 ng/hr) for 2 mo. Time spent in the open arms was measured (Student's *t* test). Results are given as mean  $\pm$  SEM. \*, *P*  $\leq$  0.05; \*\*, *P*  $\leq$  0.01; \*\*\*, *P*  $\leq$  0.001.

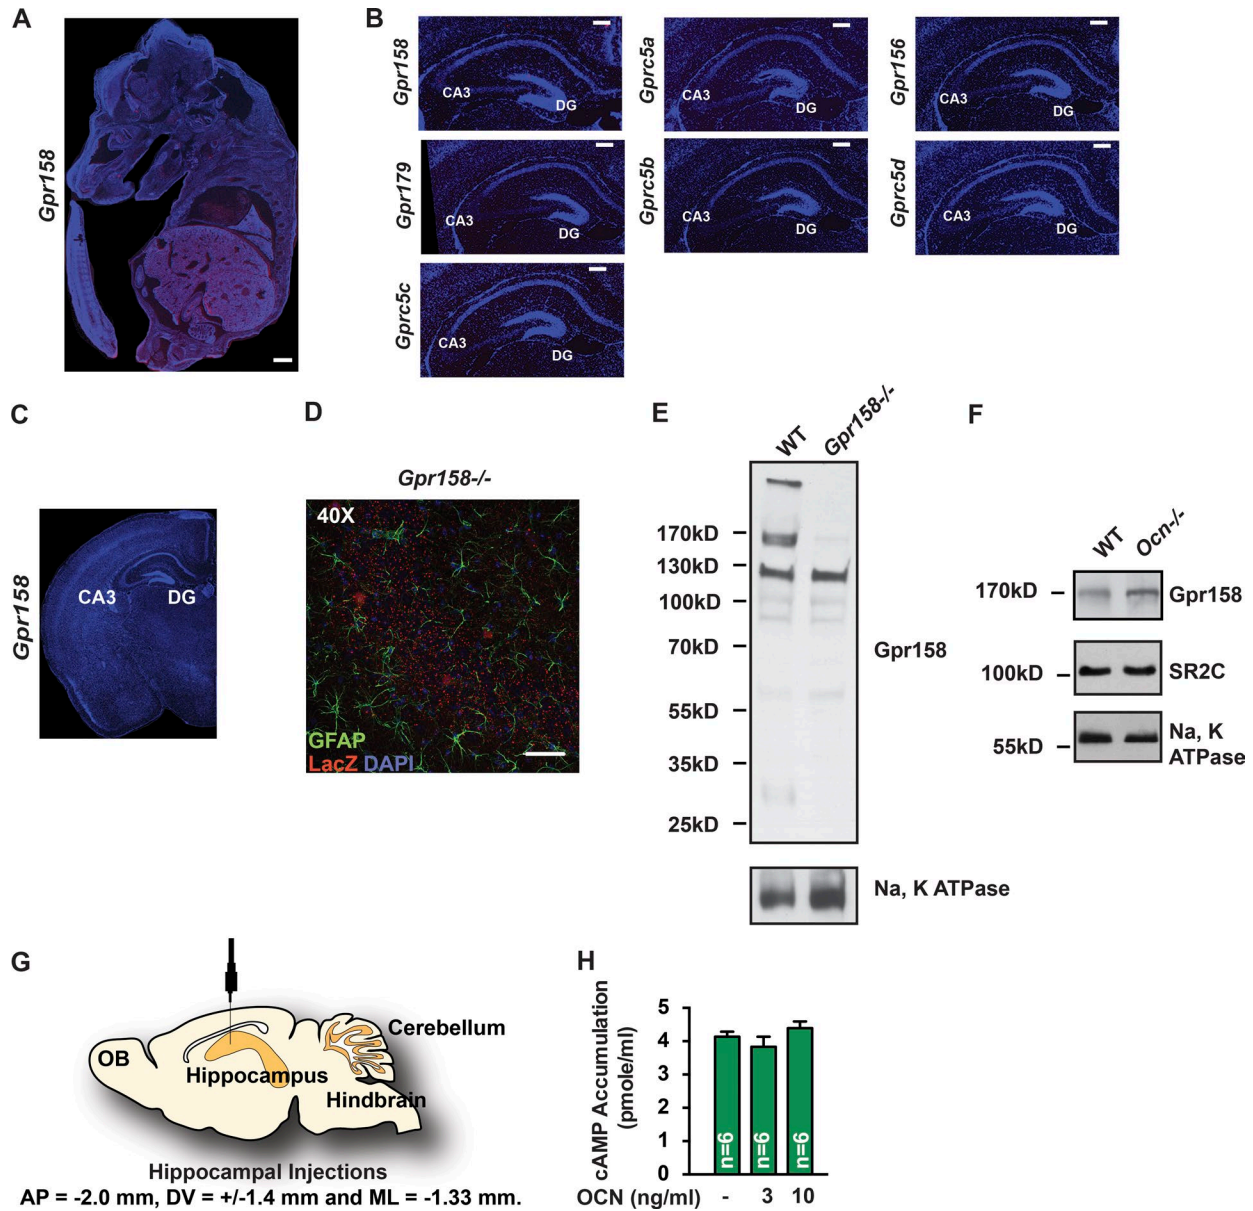

Figure S2. **Identification of a receptor for OCN in the brain.** (A) Expression (in situ hybridization) of *Gpr158* in E14.5 mouse embryos (sense probe). Bar, 0.5 mm. (B) Expression (in situ hybridization) of *Gpr156*, *Gpr179*, *Gprc5a*, *Gprc5b*, *Gprc5c*, and *Gprc5d* in the brain of 10-d-old mice (sense probe). Bar, 250 mm. (C) Expression (in situ hybridization) of *Gpr158* in the brain of 3-mo-old mice (sense probe). Bar, 250 mm. (D) Immunofluorescence of LACZ and GFAP in brain slices of 3-mo-old *Gpr158*<sup>-/-</sup> mice. Bar, 50 mm. (E) Western blot using an anti-*Gpr158* antibody in membrane preparations of WT or *Gpr158*<sup>-/-</sup> hippocampi. Na,K ATPase channel was used as a loading control. (F) *Gpr158* and serotonin receptor 2C (SR2C) accumulation (representative Western blot) in *Ocn*<sup>-/-</sup> and WT hippocampi. Na,K ATPase channel was used as a loading control. (G) Representation of stereotaxic coordinates for injection in the anterior hippocampus. AP, anteroposterior; DV, dorsal ventral; ML, medial lateral; OB, olfactory bulb. (H) cAMP accumulation in primary hippocampal neurons treated with either saline or OCN for 30 min (Student's *t* test, *n* = 6 per group). Results are given as mean  $\pm$  SEM.

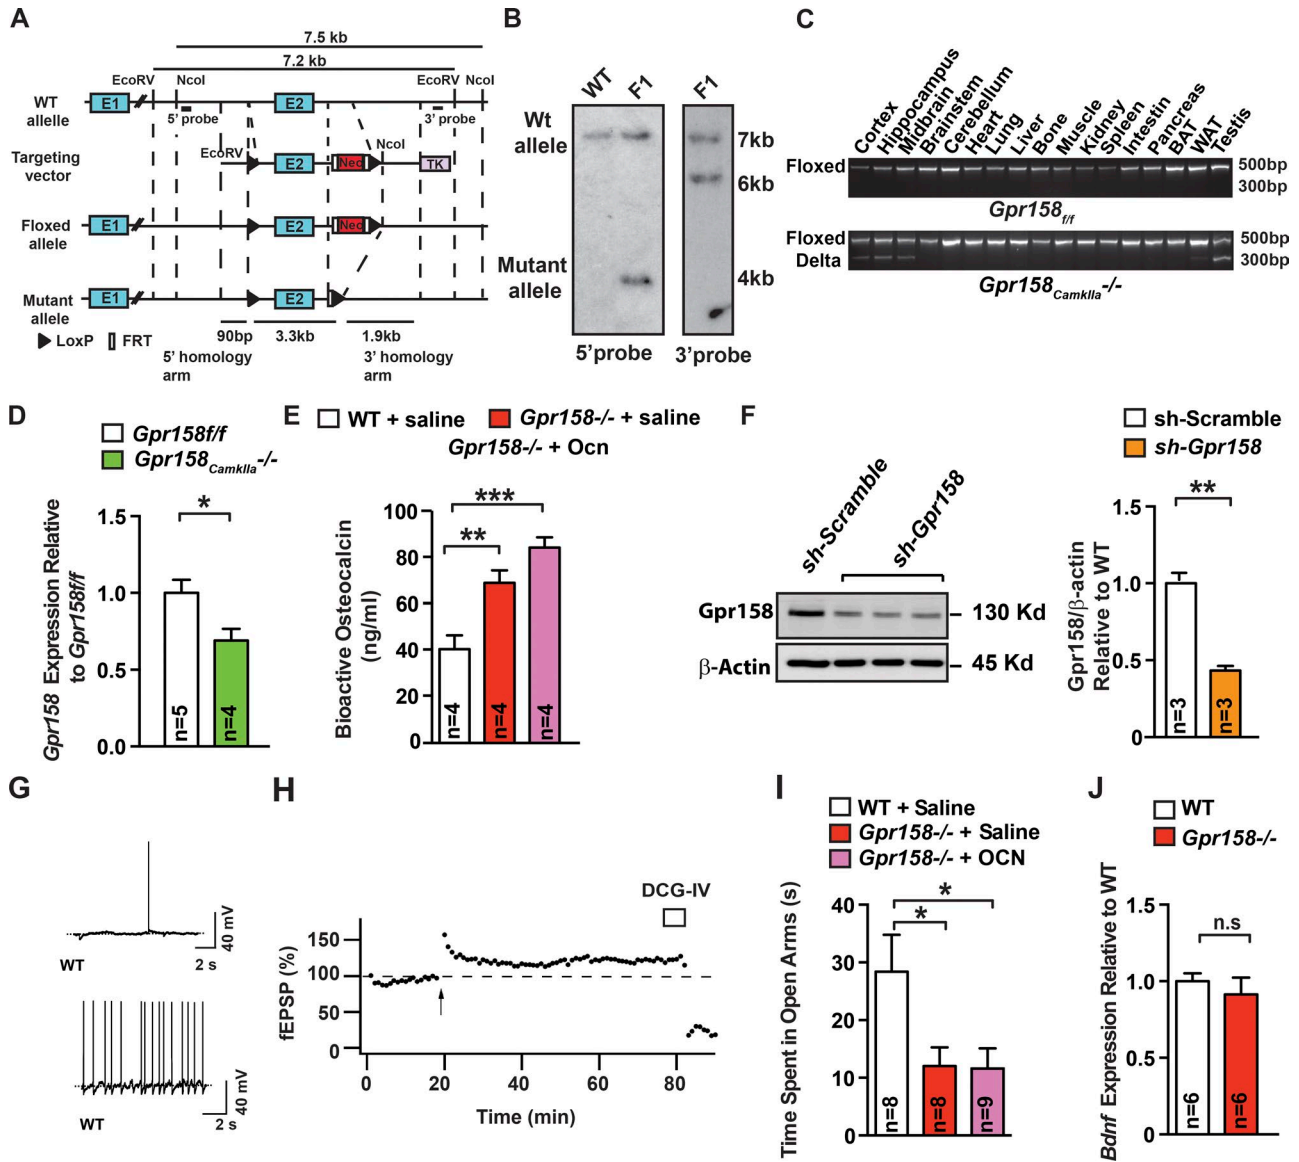

Figure S3. **Functional evidence that OCN signals through *Gpr158*.** (A) Targeting strategy used to generate a floxed allele of *Gpr158*. Bold lines represent locations of probes used for Southern blotting (5' and 3') to detect the mutated allele. (B) Southern blots showing germline transmission of the *Gpr158* floxed allele. (C) Detection of *Gpr158* mutated allele in genomic DNA isolated from tissues of *Gpr158<sup>f/f</sup>* and *Gpr158<sup>CamkIIa</sup><sup>-/-</sup>* mice. (D) *Gpr158* expression in hippocampi of 3-mo-old *Gpr158<sup>f/f</sup>* (n = 5) and *Gpr158<sup>CamkIIa</sup><sup>-/-</sup>* (n = 4) mice (Student's *t* test). (E) Bioactive osteocalcin content in the serum of 3-mo-old WT, *Gpr158<sup>-/-</sup>* mice during peripheral osteocalcin treatment (90 ng/hr) via osmotic minipump (one-way ANOVA compared with WT saline, followed by Bonferroni's post hoc test, n = 4 mice per group). (F) Representative Western blot (left) and quantification of band intensities (right) of Western blot performed in the hippocampus of WT mice injected with shRNA scramble or shRNA *Gpr158* (Student's *t* test, n = 3 per group).  $\beta$ -Actin is used as a loading control. (G) Electrophysiological traces of a single AP before osteocalcin treatment (top) and of a train of APs during osteocalcin treatment (bottom) in WT CA3 pyramidal neurons. (H) Time-course experiment showing the blockade of fEPSPs by an mGluR2/mGluR3-specific agonist, DCG-IV, after the induction of LTP at MF-CA3 synapses. Arrow, application of two trains of high-frequency stimulation. Bar, application of DCG-IV (5  $\mu$ M) to the recording chamber. (I) EPMT performed in 4-mo-old WT mice treated with saline (n = 8) or *Gpr158<sup>-/-</sup>* mice treated with saline (n = 8) or OCN (n = 9; 90 ng/hr) for 1 mo. Time spent in the open arms was scored (one-way ANOVA followed by a Bonferroni test compared with WT saline treated). (J) Quantitative PCR analysis of *Bdnf* expression in the brainstem of *Gpr158<sup>-/-</sup>* and WT (Student's *t* test, n = 6 mice per group). Results are given as mean  $\pm$  SEM. \*, P  $\leq$  0.05; \*\*, P  $\leq$  0.01; \*\*\*, P  $\leq$  0.001.
